# Supplementary material for: Exploitation of ATP-sensitive potassium ion (KATP) channels by HPV promotes cervical cancer cell proliferation by contributing to MAPK/AP-1 signalling
Source: PubMed Central journal article supplement (PMC10439009; doi:10.1038/s41388-023-02772-w), 2023-07-13
Supplement: 41388_2023_2772_MOESM1_ESM.pdf [file 41388_2023_2772_MOESM1_ESM.pdf]

## 1 **Supplementary Figure Legends**

### 2 **S1 Fig. K<sub>ATP</sub> channels are important for HPV gene expression in cervical cancer cells.**

3 **A)** Expression levels of *E6* and *E7* mRNA in HeLa cells treated with tolbutamide (200  $\mu$ M)  
4 measured by RT-qPCR. Samples were normalised against *U6* mRNA levels. **B)**  
5 Representative western blots of E6 and E7 expression in HeLa cells treated with increasing  
6 doses of tolbutamide. GAPDH served as a loading control. **C)** Mean DiBAC<sub>4</sub>(3) fluorescence  
7 levels in HeLa cells treated with increasing dose of tolbutamide. Samples were normalised to  
8 DMSO control. Data represent means  $\pm$  SD of three biological replicates. \*P<0.05, \*\*P<0.01,  
9 \*\*\*P<0.001, \*\*\*\*P<0.0001 (Student's t-test).

10

### 11 **S2 Fig. Depletion of SUR2 has no impact on HPV gene expression or proliferation in** 12 **cervical cancer cells.**

13 **A)** Relative expression of *ABCC9B* mRNA in HeLa and SiHa cells transfected with a pool of  
14 SUR2-specific siRNA measured by RT-qPCR. Samples were normalised against *U6* mRNA  
15 levels. **B)** Relative mean DiBAC<sub>4</sub>(3) fluorescence levels in HeLa and SiHa cells transfected  
16 with SUR2 siRNA. **C)** Relative expression of *E6* and *E7* mRNA in HeLa and SiHa cells  
17 transfected with SUR2 siRNA measured by RT-qPCR. Samples were normalised against *U6*  
18 mRNA levels. **D)** Representative western blots of E6 and E7 expression in HeLa and SiHa  
19 cells transfected with SUR2 siRNA. GAPDH served as a loading control. **E-G)** Growth curve  
20 analysis (**E**), colony formation assay (**F**) and soft agar assay (**G**) of HeLa and SiHa cells after  
21 transfection of SUR2-specific siRNA. Data represent means  $\pm$  SD of three biological replicates  
22 with individual data points displayed. *Ns* not significant, \*P<0.05, \*\*P<0.01, \*\*\*P<0.001  
23 (Student's t-test).

24

### 25 **S3 Fig. Depletion of Kir6.2 reduces HPV gene expression and proliferation in cervical** 26 **cancer cells.**

27 **A)** Relative expression of *KCNJ11* mRNA in HeLa and SiHa cells transfected with a pool of  
28 Kir6.2-specific siRNA measured by RT-qPCR. Samples were normalised against *U6* mRNA  
29 levels. **B)** Relative mean DiBAC<sub>4</sub>(3) fluorescence levels in HeLa and SiHa cells transfected  
30 with Kir6.2 siRNA. **C)** Relative expression of *E6* and *E7* mRNA in HeLa and SiHa cells  
31 transfected with Kir6.2 siRNA measured by RT-qPCR. Samples were normalised against *U6*  
32 mRNA levels. **D)** Representative western blots of E6 and E7 expression in HeLa and SiHa  
33 cells transfected with Kir6.2 siRNA. GAPDH served as a loading control. **E-G)** Growth curve  
34 analysis (**E**), colony formation assay (**F**) and soft agar assay (**G**) of HeLa and SiHa cells after  
35 transfection of Kir6.2-specific siRNA. Data shown is means ± SD of three biological replicates  
36 with individual data points displayed where appropriate. \*P<0.05, \*\*P<0.01, \*\*\*P<0.001,  
37 \*\*\*\*P<0.0001 (Student's t-test).

38

39 **S4 Fig. Stable suppression of SUR1 expression decreases the proliferation of cervical**  
40 **cancer cells.**

41 Growth curve analysis (**A**), colony formation assay (**B**) and soft agar assay (**C**) of monoclonal  
42 HeLa cell lines stably expressing either a non-targeting (shNTC) or a SUR1-specific shRNA.  
43 Data shown is means ± SD of three biological replicates with individual data points displayed  
44 where appropriate. \*P<0.05, \*\*P<0.01, \*\*\*P<0.001, \*\*\*\*P<0.0001 (Student's t-test).

45

46 **S5 Fig. K<sub>ATP</sub> channel inhibition does not impact upon the survival of cervical cancer**  
47 **cells.**

48 **A)** Representative western blots of PARP and caspase 3 cleavage in HeLa and SiHa cells  
49 treated with DMSO or glibenclamide (10 µM) for the indicated durations. Staurosporine  
50 treatment (STS, 1 µM for 6 hours) served as a positive control for apoptosis induction. GAPDH  
51 served as a loading control. **B)** Flow cytometry analysis of Annexin V assay using HeLa and

52 SiHa cells treated with DMSO or glibenclamide (10  $\mu$ M) for the indicated durations. Bars  
53 represent means  $\pm$  SD of three biological replicates. *Ns* not significant (Student's t-test).

54

55 **S1 Table. List of primers used for RT-qPCR in this study.**

# Supplementary Figure 1

**A**

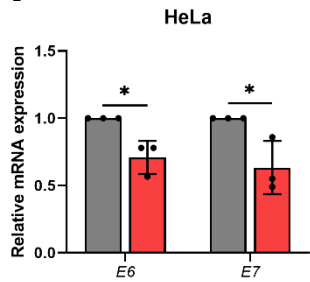

**B**

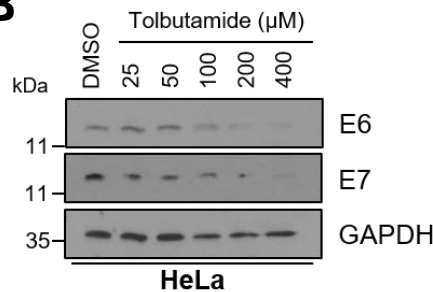

**C**

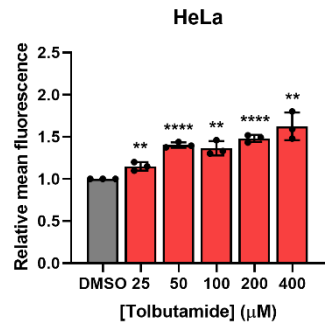

# Supplementary Figure 2

## A

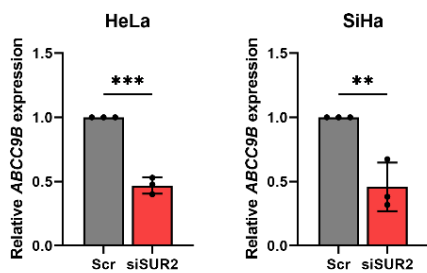

## B

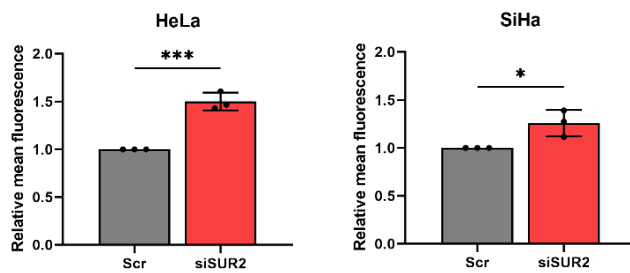

## C

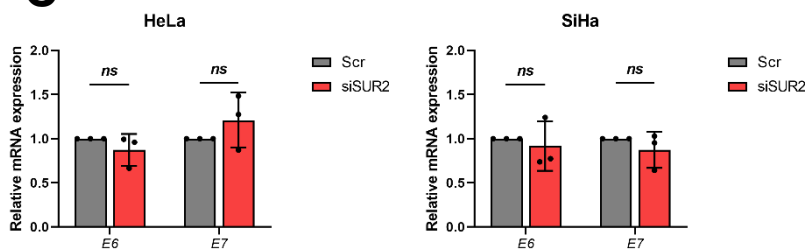

## D

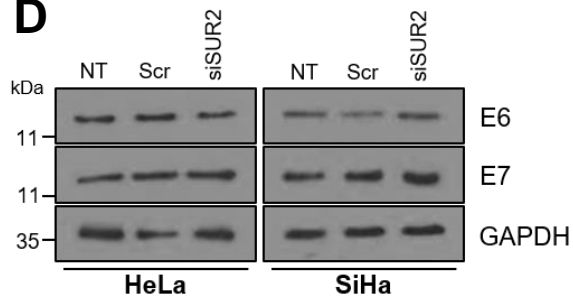

## E

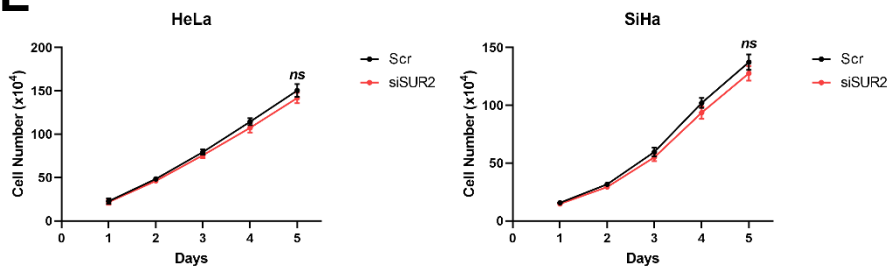

## F

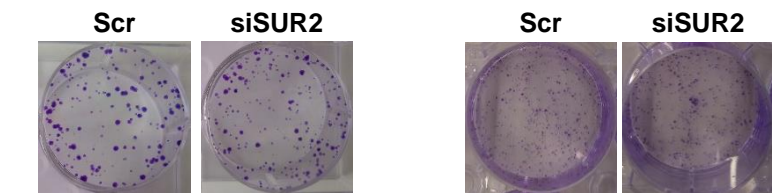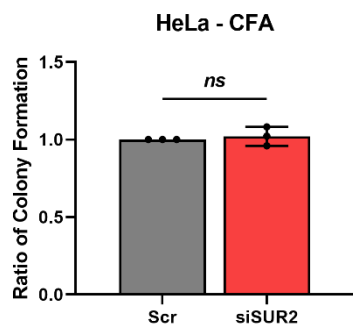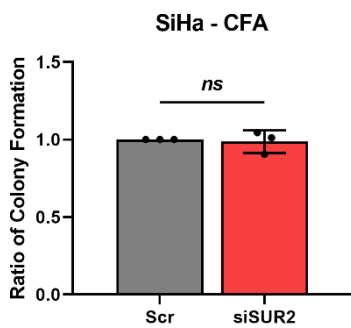

## G

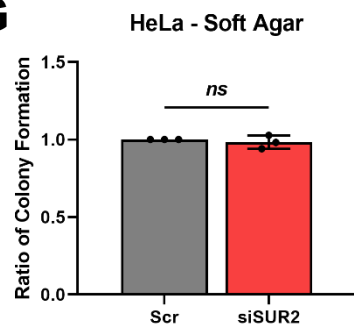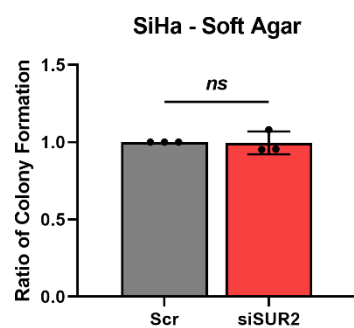

# Supplementary Figure 3

## A

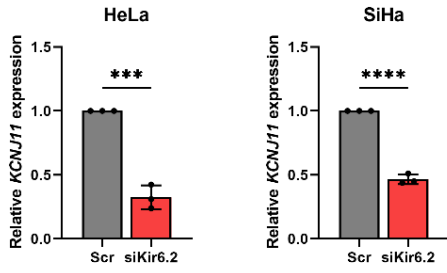

## B

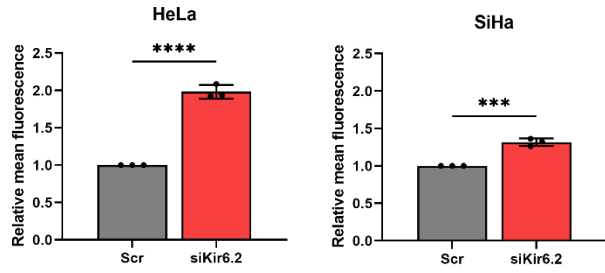

## C

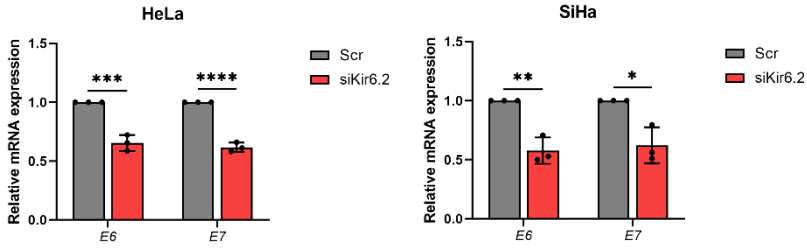

## D

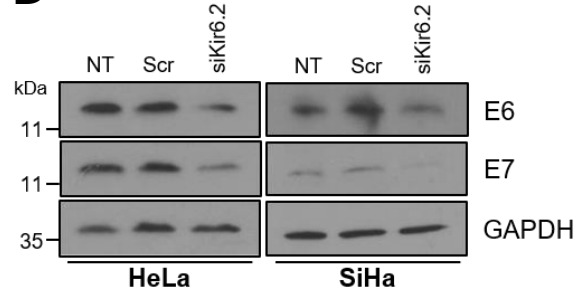

## E

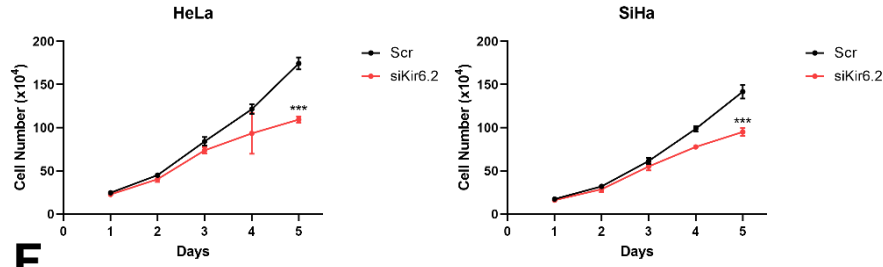

## F

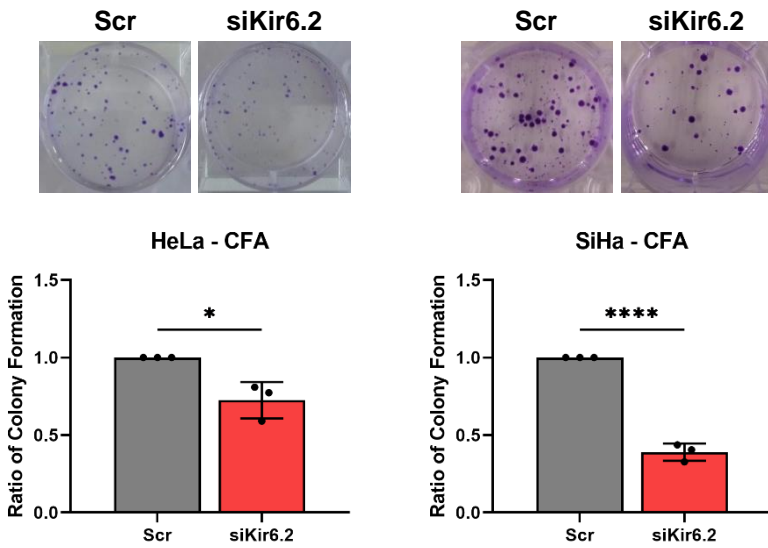

## G

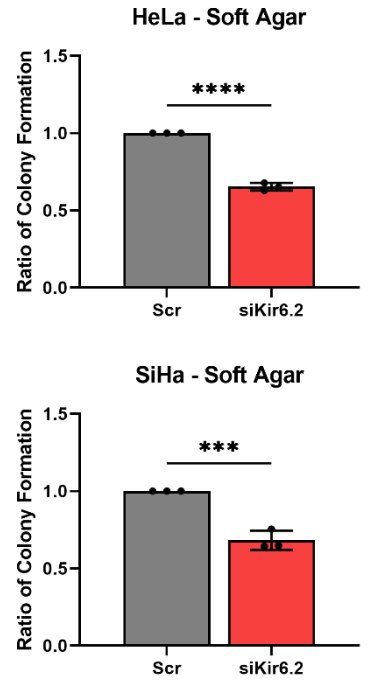

# Supplementary Figure 4

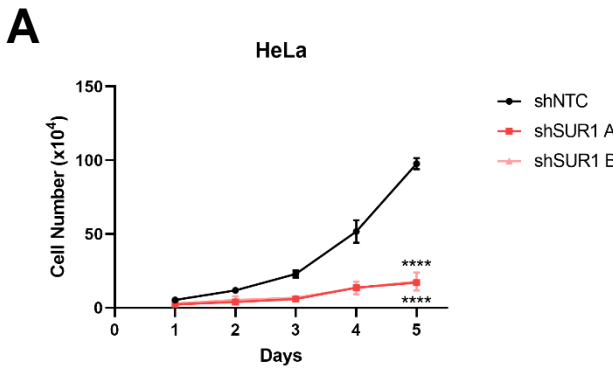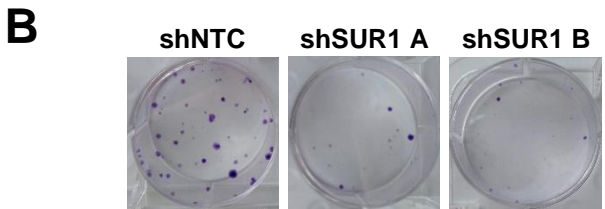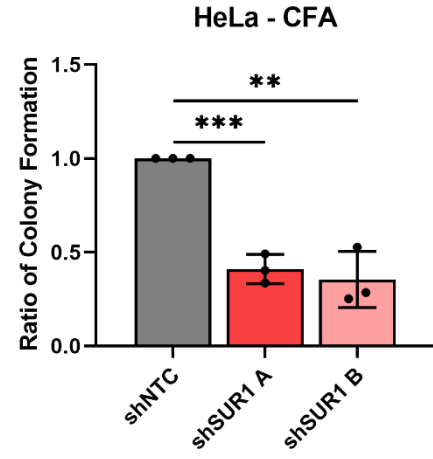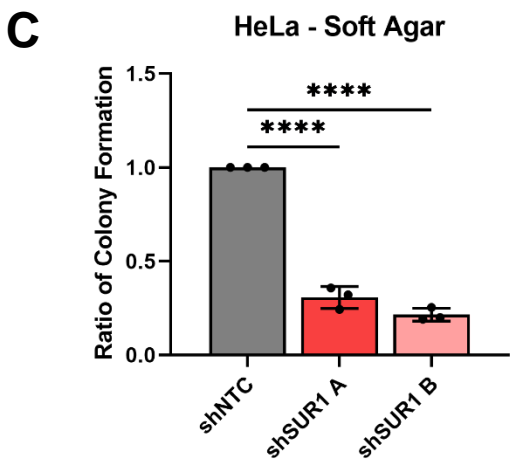

# Supplementary Figure 5

**A**

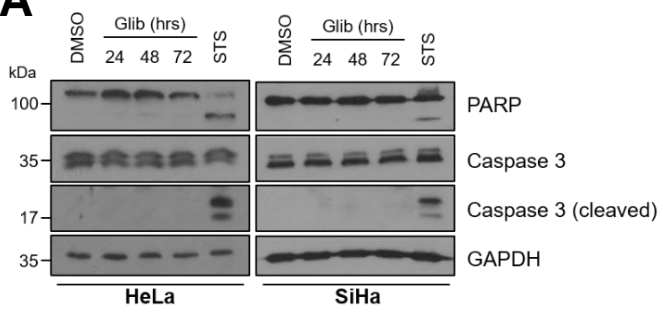

**B**

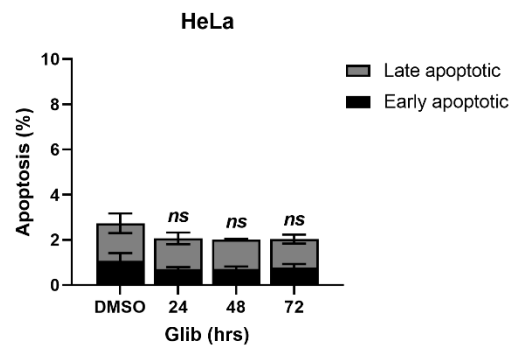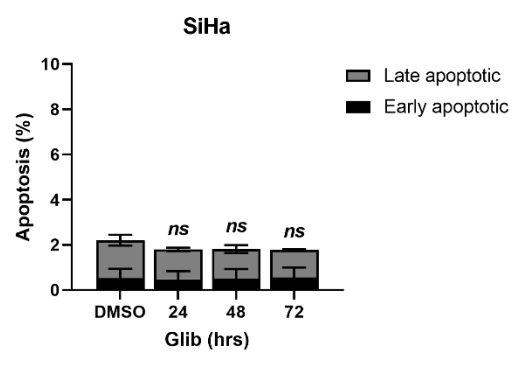



# Supplementary Table 1

| <b>Transcript</b> | <b>Forward primer (5'-3')</b> | <b>Reverse primer (5'-3')</b> |
|-------------------|-------------------------------|-------------------------------|
| HPV16 <i>E6</i>   | CTGCAATGTTTCAGGACCCAC         | GTTGTTTGCAGCTCTGTGCAT         |
| HPV16 <i>E7</i>   | ATTAAATGACAGCTCAGAGGA         | GCTTTGTACGCACAACCGAAGC        |
| HPV18 <i>E6</i>   | TGGCGCGCTTTGAGGA              | TG TTCAGTTCCGTGCACAGATC       |
| HPV18 <i>E7</i>   | GACCTAAGGCAACATTGCA           | GCTCGTGACATAGAAGGTC           |
| <i>KCNJ8</i>      | CTGGCTGCTCTTCGCTATC           | AGAATCAAAACCGTGATGGC          |
| <i>KCNJ11</i>     | CCAAGAAAGGCAACTGCAACG         | ATGCTTGCTGAAGATGAGGGT         |
| <i>ABCC8</i>      | GGTGACCGAATCCCACCATC          | CAGGGCAATTAGCAGCTTGG          |
| <i>ABCC9A</i>     | CTGGCTTTCTTCAGAATGGT          | AAATACCCTCAGAAAAGACTAAAAC     |
| <i>ABCC9B</i>     | TGTGATGAAGCGAGGAAATA          | TGACACTTCCATTCTGAGAGA         |
| <i>GFP</i>        | ACGTAAACGGCCACAAGTTC          | AAGTCGTGCTGCTTCATGTG          |
| <i>CCNA2</i>      | TGGAAAGCAAACAGTAAACAGCC       | GGGCATCTTCACGCTCTATTT         |
| <i>CCNB1</i>      | AAGAGCTTTAACTTTGGTCTGGG       | CTTTGTAAGTCCTTGATTTACCATG     |
| <i>CCND1</i>      | CCGCTGGCCATGAACTACCT          | ACGAAGGTCTGCGCGTGTT           |
| <i>CCNE1</i>      | GCCAGCCTTGGGACAATAATG         | CTTGACGTTGAGTTTGGGT           |
| <i>U6</i>         | CTCGCTTCGGCAGCACA             | AACGCTTCACGAATTTGCGT          |
